# Supplementary material
Source: PubMed Central journal article supplement (PMC3070196)
Supplement: NIHMS246665-supplement-1_si_001.pdf [file NIHMS246665-supplement-1_si_001.pdf]

# Degradable Nitric Oxide-Releasing Biomaterials via Post-Polymerization Functionalization of Crosslinked Polyesters

Peter N. Coneski, Kavitha S. Rao and Mark H. Schoenfisch\*

*Department of Chemistry, University of North Carolina at Chapel Hill, Chapel Hill, NC*

27599-3290

*schoenfisch@unc.edu*

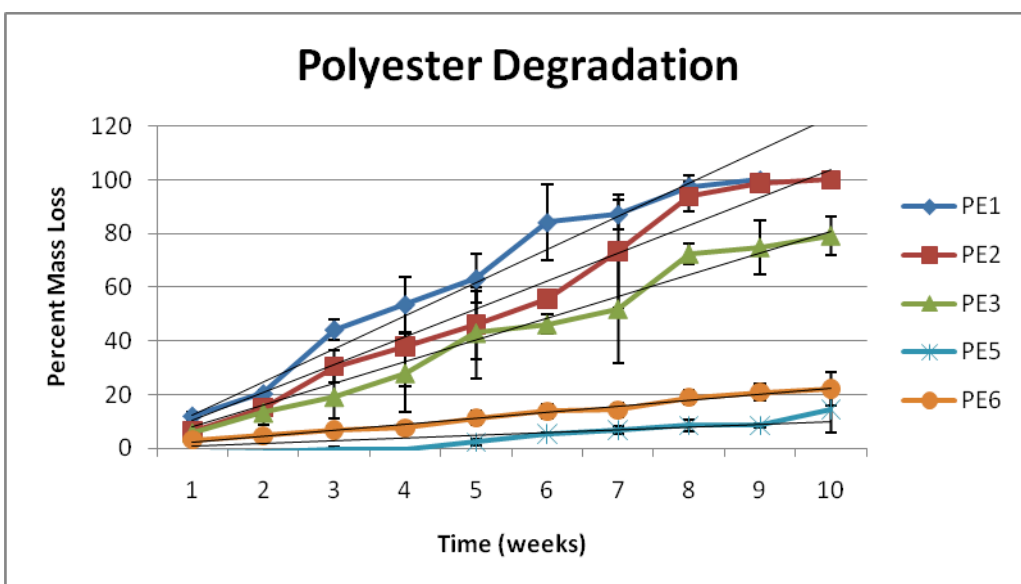

PE1:  $y = 12.322x$ ;  $R^2 = 0.9622$

PE2:  $y = 10.377x$ ;  $R^2 = 0.9721$

PE3:  $y = 8.0609x$ ;  $R^2 = 0.975$

PE5:  $y = 0.9704x$ ;  $R^2 = 0.7129$

PE6:  $y = 2.2369x$ ;  $R^2 = 0.9842$

**Figure 1.** Kinetic fits of polyester degradation for PE1, PE2, PE3, PE5 and PE6.

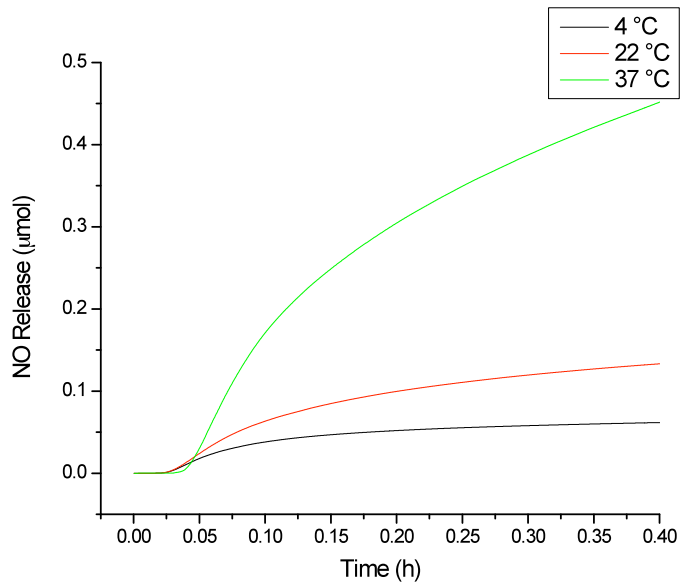

**Figure 2.** Temperature dependence of NO release for NPE1A.

**Table 1.** Thermal analysis for functionalized and nitrosated polyesters.

| Sample | 5% wt loss<br>(°C) | 10% wt loss<br>(°C) |
|--------|--------------------|---------------------|
| FPE1A  | 265                | 324                 |
| NPE1A  | 260                | 323                 |
| FPE1B  | 291                | 332                 |
| NPE1B  | 301                | 344                 |
| FPE2A  | 297                | 338                 |
| NPE2A  | 306                | 339                 |
| FPE2B  | 262                | 311                 |
| NPE2B  | 299                | 334                 |
| FPE3A  | 270                | 340                 |
| NPE3A  | 236                | 366                 |
| FPE3B  | 259                | 397                 |
| NPE3B  | 250                | 389                 |
| FPE4A  | 407                | 435                 |
| NPE4A  | 385                | 406                 |
| FPE4B  | 352                | 404                 |
| NPE4B  | 381                | 408                 |
| FPE5A  | 279                | 373                 |
| NPE5A  | 291                | 369                 |
| FPE6A  | 292                | 371                 |
| NPE6A  | 277                | 376                 |

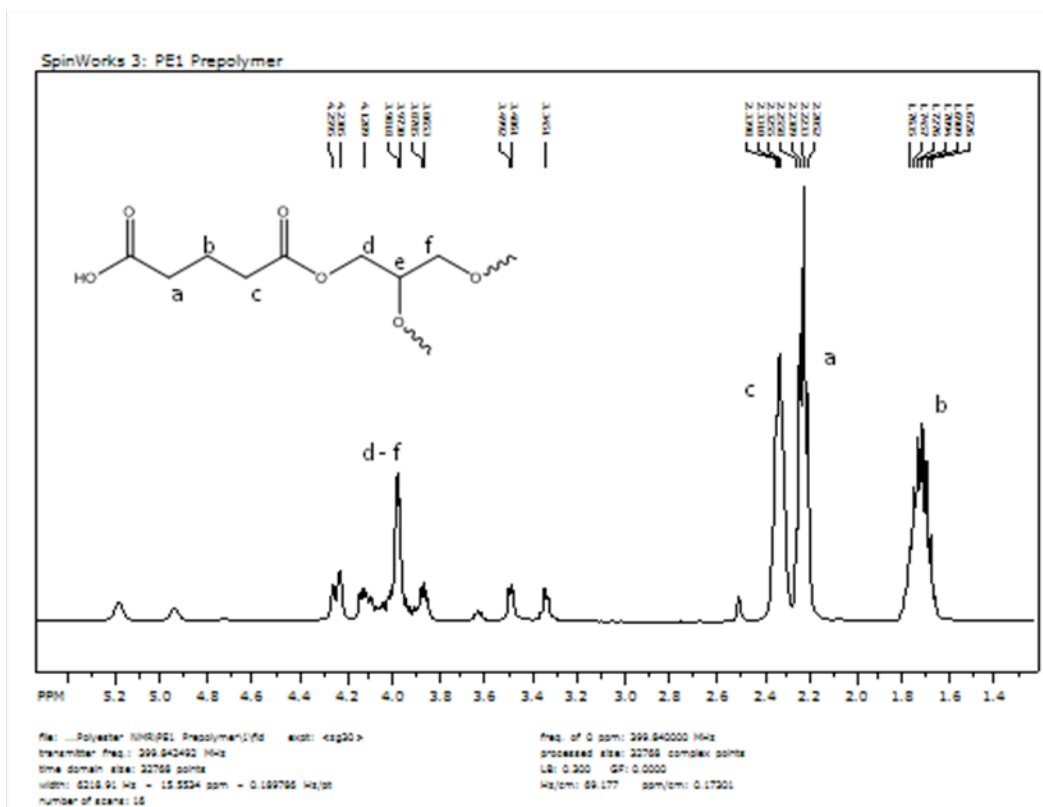

Figure 3. <sup>1</sup>H NMR spectra of PE1 prepolymer in DMSO – d<sub>6</sub>.

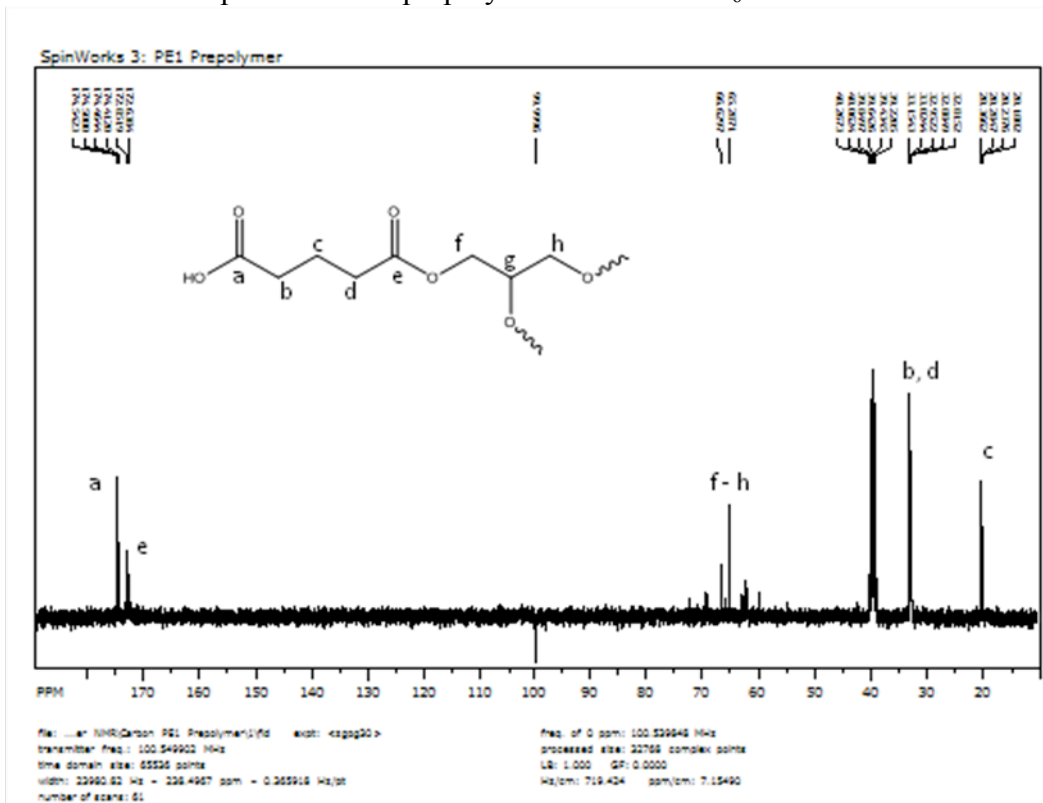

Figure 4. <sup>13</sup>C NMR spectra of PE1 prepolymer in DMSO – d<sub>6</sub>.



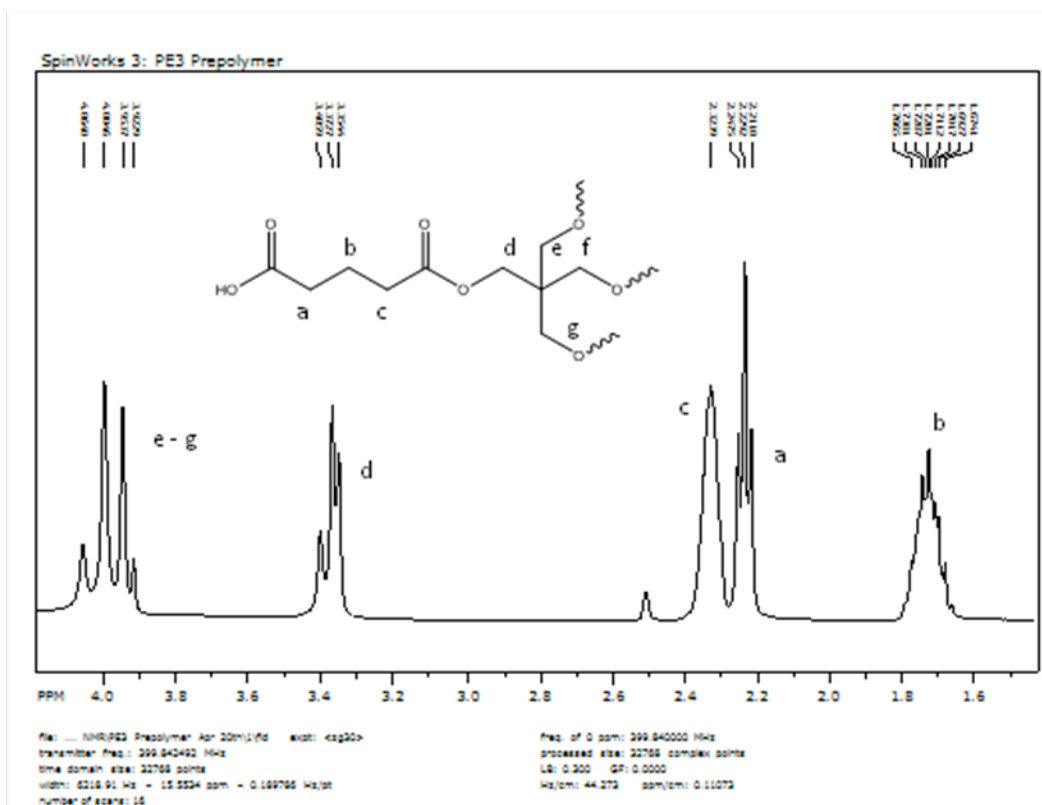

Figure 7. <sup>1</sup>H NMR spectra of PE3 prepolymer in DMSO – d<sub>6</sub>.

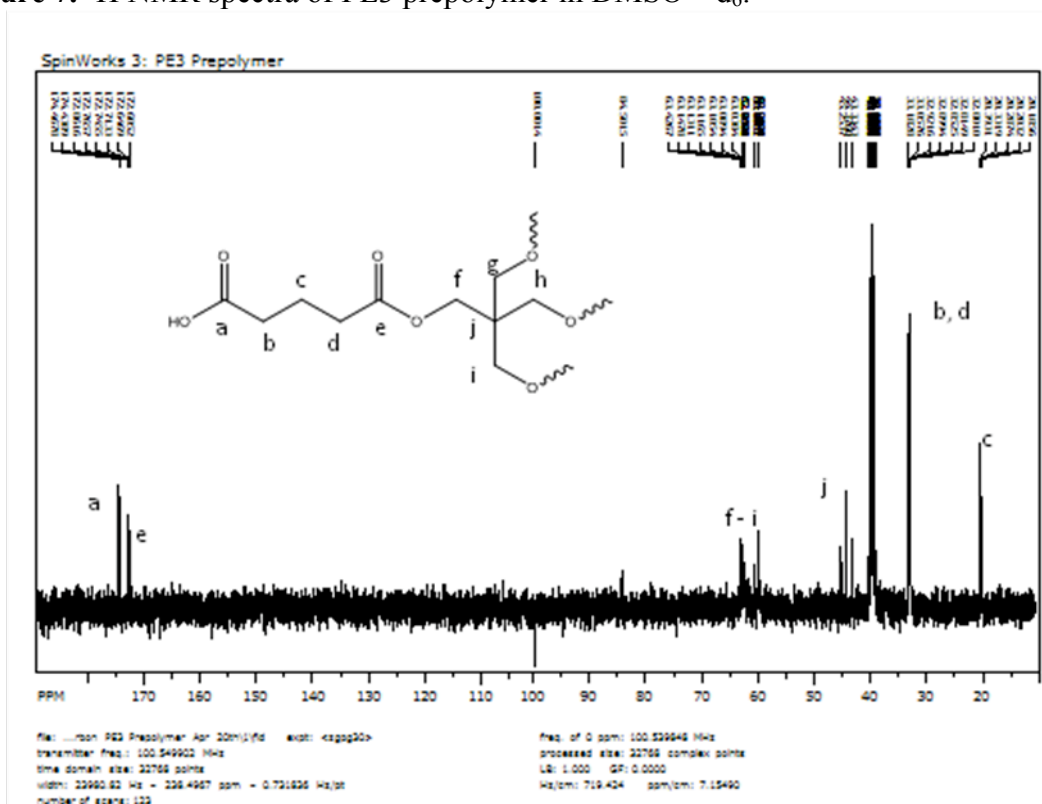

Figure 8. <sup>13</sup>C NMR spectra of PE3 prepolymer in DMSO – d<sub>6</sub>.



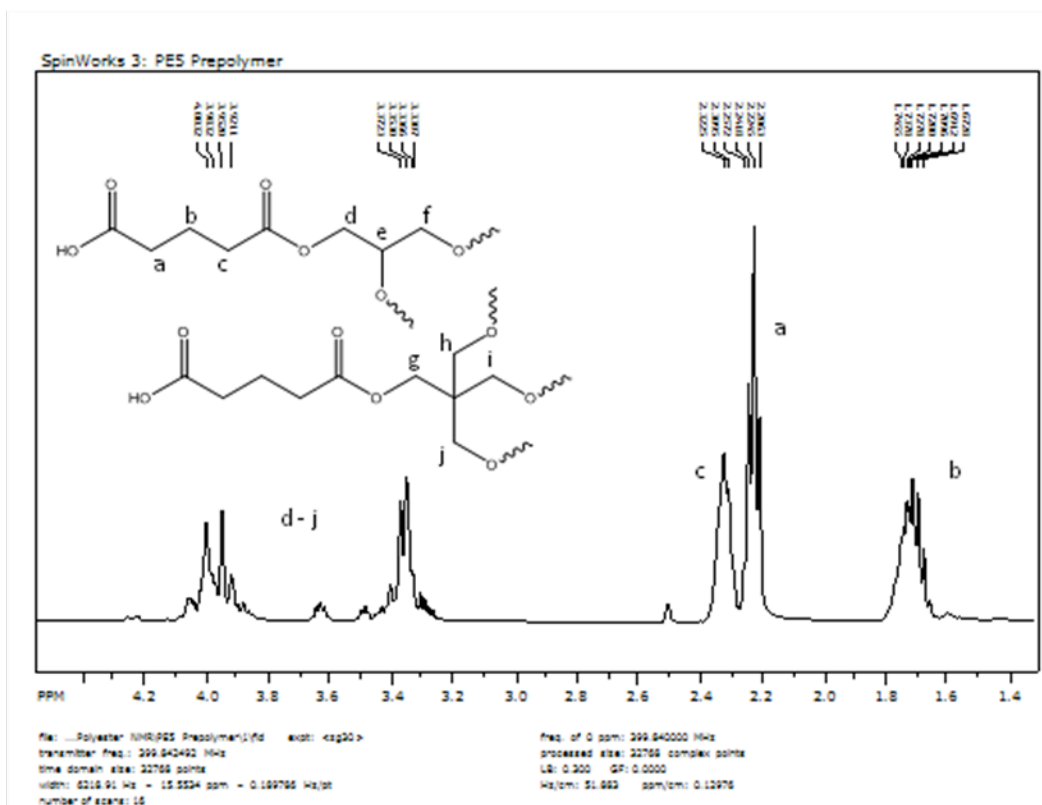

Figure 11. <sup>1</sup>H NMR spectra of PE5 prepolymer in DMSO – d<sub>6</sub>.

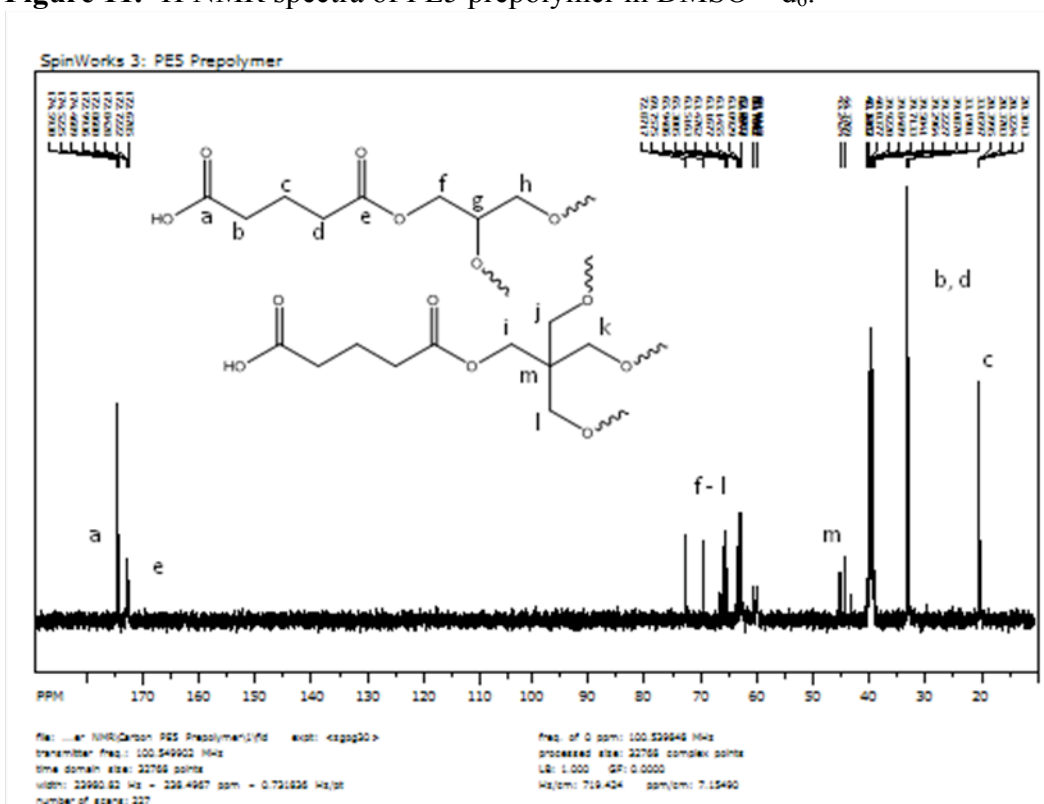

Figure 12. <sup>13</sup>C NMR spectra of PE5 prepolymer in DMSO – d<sub>6</sub>.
